# Supplementary material
Source: publisher figshare collection journal article supplement (https://acs.figshare.com/ndownloader/files/13272644)
Supplement: Supplementary file 1 [file 13272644]

# Supporting Information for

## The role of point defects in enhancing the conductivity of $\text{BiVO}_4$

Hosung Seo<sup>1,2,3\*</sup>, Yuan Ping<sup>4\*</sup> and Giulia Galli<sup>2,3,5†</sup>

1. Department of Physics and Department of Energy Systems Research, Ajou University, Suwon, Gyeonggi 16499, Republic of Korea
2. The Institute for Molecular Engineering, The University of Chicago, Chicago, IL 60615, USA
3. Materials Science Division, Argonne National Laboratory, Argonne, IL 60439, USA
4. Department of Chemistry and Biochemistry, University of California, Santa Cruz, Santa Cruz, CA 95064, USA
5. Department of Chemistry, University of Chicago, Chicago, IL 60615, USA

---

\* These authors equally contributed to this work.

† Correspondence to gagalli@uchicago.edu

**Figure S1.** Electronic structure of *n*-doped *ts*-BVO

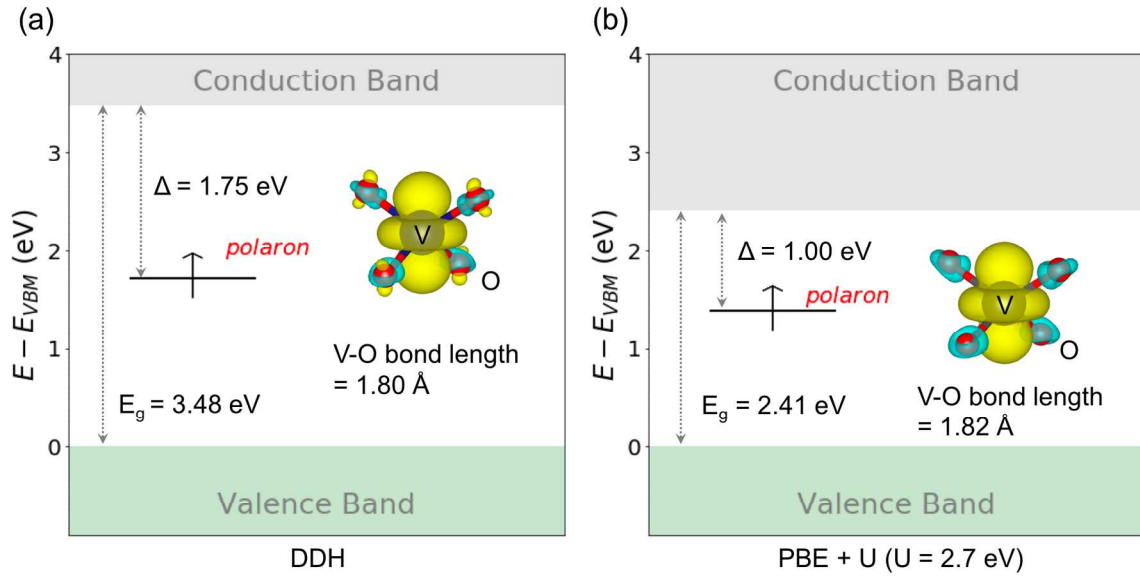

**Figure S1.** Electronic structure of *ts*-BVO with one extra electron per supercell calculated using the DDH (a) and the PBE+*U* (*U*=2.7 eV) functionals (b). In both cases, a singly-occupied non-dispersive polaronic state is formed inside the band gap of BVO. Insets show the square modulus of the electronic wavefunction associated with the polaronic state, showing that the excessive electron mainly occupies a V  $3d_{z^2}$  orbital. The  $V^{5+}$  ion has 4 nearest neighbor  $O^{2-}$  ions arranged in a tetrahedral geometry; the crystal field splitting of the V  $3d$  manifold yields  $t_{2g}$  and  $e_g$  states. Additional tetragonal distortions further split the low-lying  $e_g$  manifold, pushing the  $V^{5+}$   $3d_{z^2}$  orbital lower in energy than the  $3d_{x^2-y^2}$  orbital; the latter largely contributes to the character of the CBM<sup>1</sup>. Hence the occupied electronic state localized below the CBM has a V  $3d_{z^2}$  character. The ionic relaxation associated with the polaron formation is found to be largely isotropic: the four nearest neighbors  $O^{2-}$  ions move outward from the V site by about 0.08 Å at both the DDH and PBE+*U* levels of theory.

**Figure S2.** Total energy of a BVO crystal with an electron localized at a neutral oxygen vacancy.

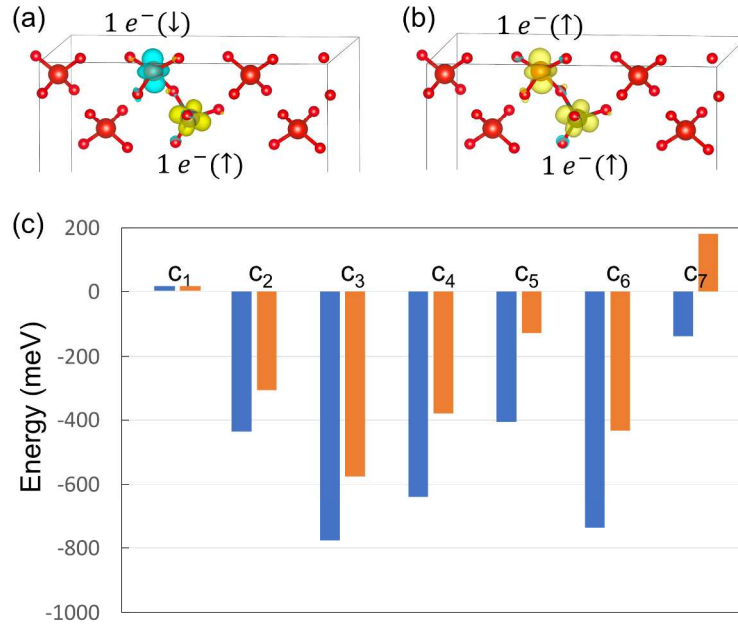

**Figure S2.** (a,b) Singlet ( $S=0$ ) (a) and triplet ( $S=1$ ) (b) spin configurations of two electrons localized at the O vacancy site (configuration c4 in Fig. 3(d)) in  $\text{BiVO}_4$ . In (a) and (b), the spin-up and spin-down densities are shown in yellow and blue, respectively. The energy difference between the two configurations ( $E(S=1) - E(S=0)$ ) is calculated to be -10.6 meV at the DDH level of theory. The small energy difference implies that the exchange interaction between the two electrons localized at the neutral oxygen vacancy in BVO is negligible and the two spins are independent. (c) Total energies of the BVO crystal with an electron localized at a neutral oxygen vacancy (OV), computed using the DDH (blue) and PBE+U ( $U = 2.7$  eV; orange) functionals. The geometrical configurations c1 to c7 are defined in Fig. 2 of the main text; the energy of c1 is chosen as the zero of energy.

**Figure S3. Configurations of the OV with a polaron**

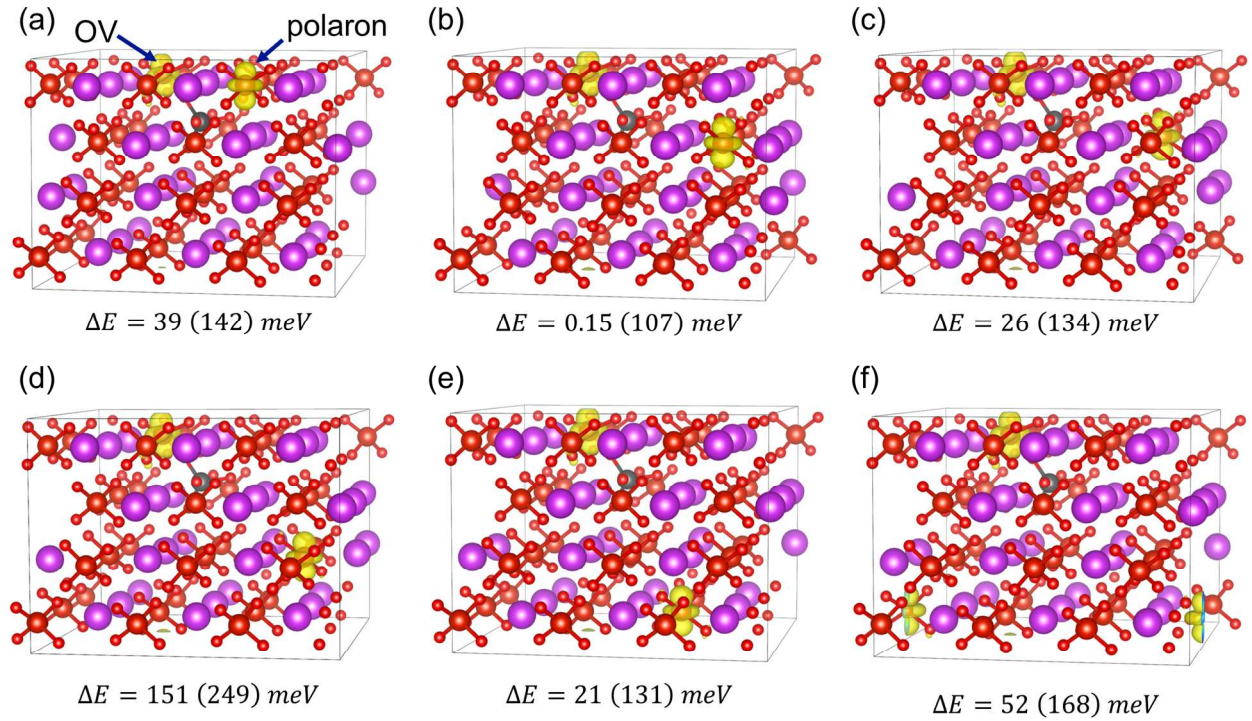

**Figure S3.** Various configurations of electron polaron in the presence of the O vacancy. The configuration in (a) is the c6 configuration reported in Fig. 3 in the main paper, where one electron forms a small polaron in the bulk region while one electron is trapped at the OV site. The other configurations in (b) to (f) are similar configurations: one electron is trapped at the same OV site and the other electron forms a small polaron at various places in the bulk region of BVO. To calculate the relative energy ( $\Delta E$ ), the energy of the c3 configuration (Fig. 3(c), both of the two electrons are trapped at the OV site) is chosen as the zero of energy.

**Figure S4. Configurations of a positively charged oxygen vacancy**

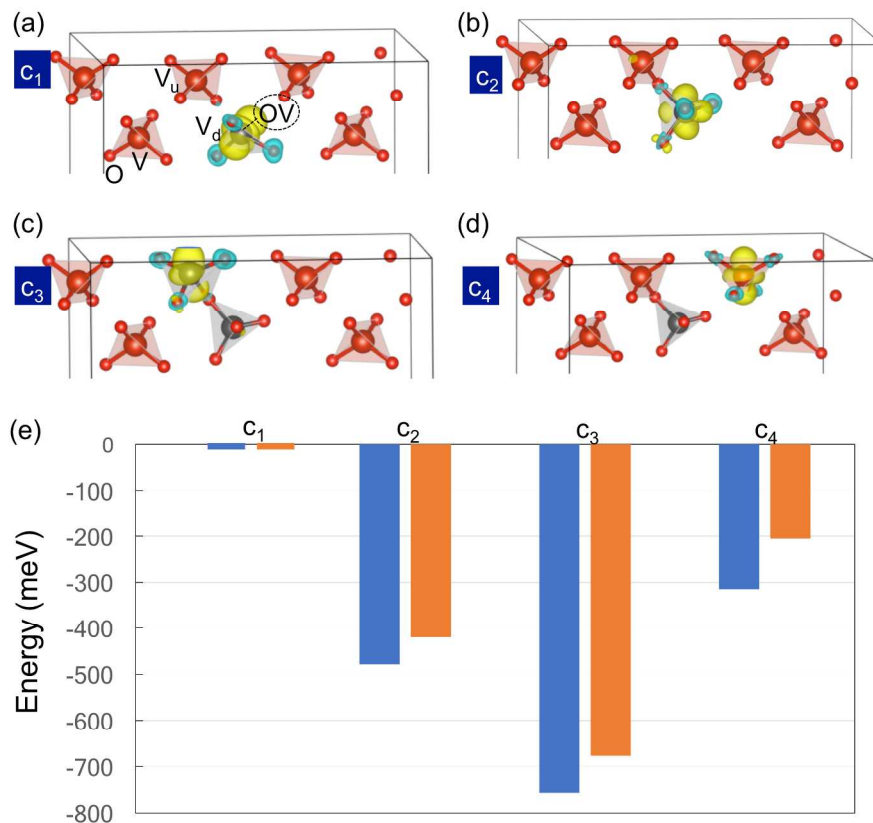

**Figure S4.** Several configurations of electrons localized near a positively charged oxygen vacancy (OV<sup>+</sup>) in BVO (**a** to **d**), and corresponding total energies of the defect states computed using the DDH (blue) and PBE+U (U = 2.7 eV; orange) functionals (**e**). Vanadium and oxygen atoms are represented by large and small red spheres, respectively. Bi atoms and some of VO<sub>4</sub> tetrahedra are omitted for clarity. (**a**) An electron originating from the OV<sup>+</sup> (represented by a dotted sphere) is localized at a V atom site (labeled as V<sub>d</sub> and represented by a black sphere) in the O-deficient VO<sub>3</sub> unit. (**b** to **d**) OV configurations where the O-deficient VO<sub>3</sub> unit has a nearly VO<sub>4</sub> tetrahedral geometry, where one O ion is shared with a nearest neighboring VO<sub>4</sub> unit whose V atom is labeled as V<sub>u</sub>. The extra electron donated by the OV<sup>+</sup> can be both trapped at the V<sub>d</sub> site (**b**) or at the V<sub>u</sub> site (**c**). In (**d**), we show a configuration where the extra electron leaves the OV<sup>+</sup> site and forms a small polaron in the bulk region of BVO. In the diagram reported in (**e**), total energies are referred to that of the c<sub>1</sub> configuration.

**Figure S5. Defect formation energies obtained with the PBE+U functional**

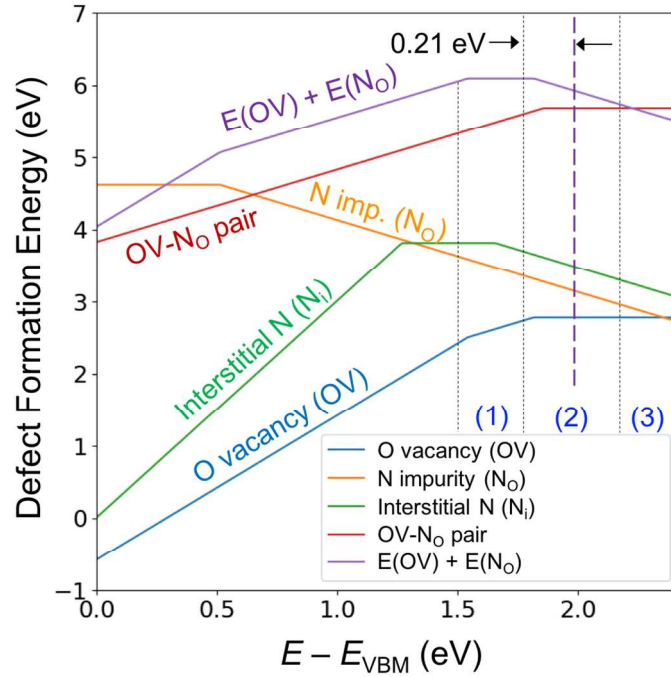

**Figure S5.** Defect formation energies (DFEs) of an oxygen vacancy (OV), a substitutional nitrogen ( $N_O$ ), a interstitial nitrogen ( $N_i$ ) and an OV- $N_O$  pair in BVO in the O-rich limit, calculated by using the PBE+U ( $U = 2.7$  eV) functional. The DFE is calculated as a function of Fermi level ( $E$ ) from the valence band maximum (VBM,  $E_{VBM}$ ) to the CBM, which is the right end of the plot. There are three distinctive regions of stability for OV and OV- $N_O$  pairs, near the CBM, denoted as (1), (2), and (3) (see the main text). The figure shows the lowest energy configurations for all defects and all charge states. Some of the meta-stable states (higher in energy) found in our calculations are reported in the SI (e.g. see Fig. S4 for a positively charged OV). The slope of a DFE line corresponds to the charge state of the defect, and the position of the Fermi level where two different charge states intersect yields the charge transition level (CTL, see Eq.1). The energy difference between the (+1/0) CTL of the OV (black, vertical, dotted line dividing the area (1) and (2)) and the CBM defines the ionization energy of the neutral OV with respect to the CBM. The vertical, purple, dashed line indicates the polaron level in BVO and the difference between this line and the (+1/0) CTL of the OV is calculated to be 0.21 eV; this energy corresponds to the ionization energy of the neutral OV with respect to the polaron level in BVO.

**Figure S6.** Electron localized at a substitutional nitrogen site

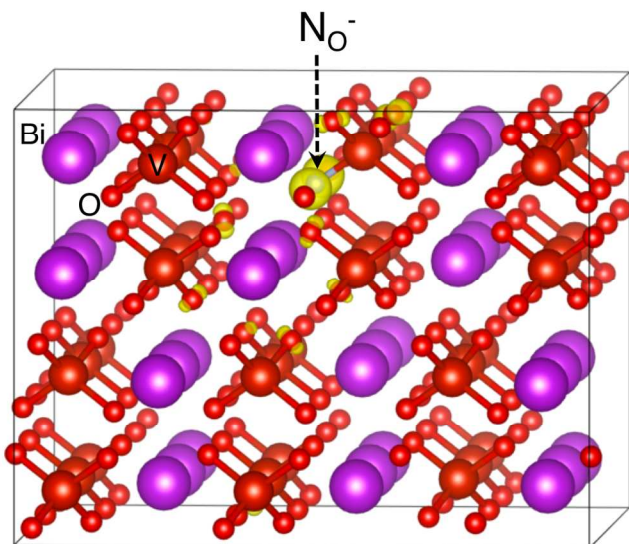

**Figure S6.** Square modulus of the wavefunction of the highest occupied defect state associated with the presence of a substitutional N dopant. An extra electron added to the supercell is mostly localized at the N site, indicating that  $N^{3-}$  configuration is energetically favored. In addition, we found that the occupied  $N_O$ -induced band is within 0.2 eV from the VBM (at the DDH level of theory), giving rise to a level resonant with the O 2p states.



**Figure S7. Ground-state structure of a neutral oxygen vacancy-nitrogen dopant complex**

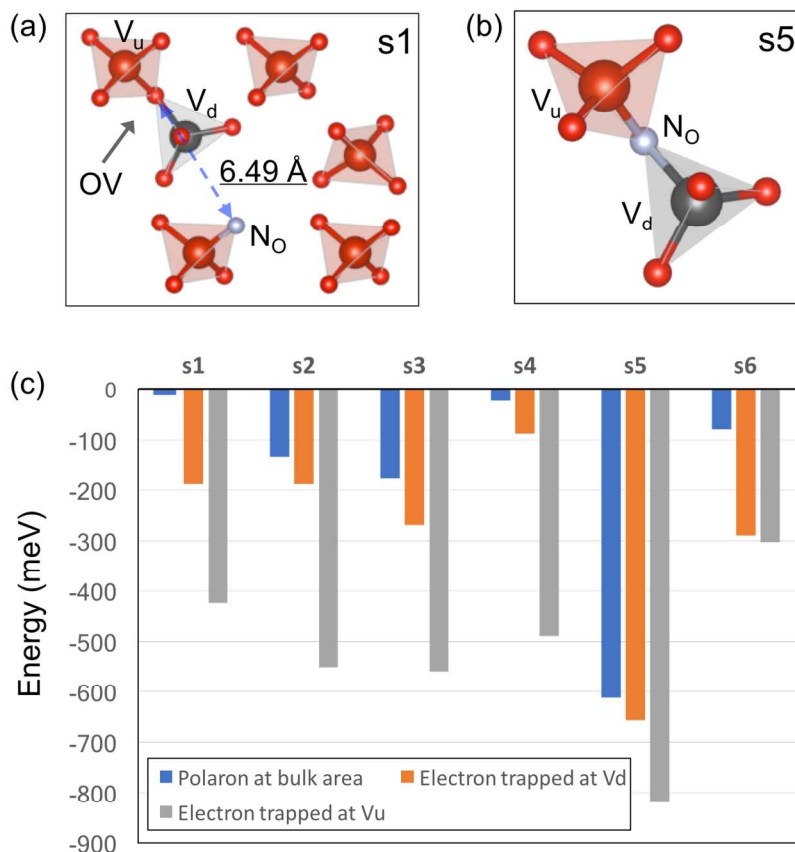

**Figure S7.** Ground-state structure of a neutral oxygen vacancy-nitrogen dopant (OV-N<sub>O</sub>) defect complex ( $q = 0$ ). In the neutral charge state, two extra electrons are donated by each OV, with one electron tightly bound to the N<sub>O</sub> site, as discussed in the main text. The state of the neutral OV-N<sub>O</sub> pair is characterized by (1) the distance between the N<sub>O</sub> and the OV and (2) the localization site of the extra electron. In **(a)** and **(b)**, the N<sub>O</sub> is placed at a distance of 6.49 Å (labeled as s1) and 0 Å (labeled as s5), respectively, from the OV, whose central position is defined to be the joint position of the corner-sharing VO<sub>4</sub> tetrahedra. We also considered cases in which the N<sub>O</sub> is placed at different O sites of the corner-sharing VO<sub>4</sub> tetrahedra, which are labeled as s2, s3, s4, and s6. For a given OV-N<sub>O</sub> distance, the excess electron can be trapped either at the V<sub>d</sub> or the V<sub>u</sub> site, or it can form a polaron in the bulk region of BVO away from the OV structure. The graph in **(c)** compares the total energy of different possible configurations of the neutral OV-N<sub>O</sub> defect, calculated at the PBE+U level of theory; we found that the s5 configuration is the ground state, with the extra electron trapped at the V<sub>u</sub> site, the same as the ground-state structure of the positively charged OV-N<sub>O</sub> discussed in Fig. 4.



**Table S1.** Computed bulk properties of  $ts\text{-BiVO}_4$  at the PBE, PBE+U, and DDH levels of theory. The lattice parameters, several bond lengths, and the band gap are reported. Note that the computed fundamental gap does not include spin-orbit coupling and temperature effects, which are supposed to lower the gap obtained here<sup>2</sup> by  $\sim 0.15$  and  $0.5$  eV, respectively.

|                                     | Lattice parameters ( $\text{\AA}$ ) |        | Bond lengths ( $\text{\AA}$ ) |               | Band gap (eV)            |
|-------------------------------------|-------------------------------------|--------|-------------------------------|---------------|--------------------------|
|                                     | a                                   | c      | V-O                           | Bi-O          | Indirect                 |
| PBE, this work                      | 5.174                               | 11.768 | 1.735                         | 2.462 / 2.506 | 2.32                     |
| PBE+U, this work                    | 5.173                               | 11.771 | 1.740                         | 2.450 / 2.510 | 2.41                     |
| DDH, this work                      | 5.133                               | 11.682 | 1.722                         | 2.436 / 2.492 | 3.48                     |
| PBE0 hybrid functional <sup>3</sup> | 5.121                               | 11.647 | 1.721                         | 2.431 / 2.481 | 3.25                     |
| Experiment <sup>4-8</sup>           | 5.147                               | 11.722 | 1.72                          | 2.453/2.499   | 2.4-2.5<br>(optical gap) |

**Table S2.** Relative charge transition levels of the OV,  $N_O$ , and OV- $N_O$  defects with respect to the conduction band edge calculated at the DDH and DFT+U levels of theory.

| Defect type | CTL type | DDH CTL (eV) | DFT+U CTL (eV) |
|-------------|----------|--------------|----------------|
| OV          | (+2/+1)  | 1.15         | 0.89           |
|             | (+1/0)   | 0.77         | 0.61           |
| $N_O$       | (0/-1)   | 2.38         | 1.92           |
| OV- $N_O$   | (+1/0)   | 0.83         | 0.57           |

### Supplementary reference

1. Kweon, K.; Hwang, G.; Kim, J.; Kim, S., Electron small polarons and their transport in bismuth vanadate: a first principles study. *Phys. Chem. Chem. Phys.* **2015**, 17, 256-260.
2. Wiktor, J.; Reshetnyak, I.; Ambrosio, F.; Pasquarello, A., Comprehensive modeling of the band gap and absorption spectrum of BiVO<sub>4</sub>. *Phys. Rev. Mater.* **2017**, 1, 022401(R).
3. Kweon, K.; Hwang, G., Hybrid density functional study of the structural, bonding, and electronic properties of bismuth vanadate. *Phys. Rev. B* **2012**, 86, 165209.
4. Sleight, A.; Chen, H.; Ferretti, A.; Cox, D., Crystal-growth and structure of BiVO<sub>4</sub> *Mater. Res. Bull.* **1979**, 14, 1571-1581.
5. Payne, D.; Robinson, M.; Egdell, R.; Walsh, A.; McNulty, J.; Smith, K.; Piper, L., The nature of electron lone pairs in BiVO<sub>4</sub>. *Appl. Phys. Lett.* **2011**, 98, 212110.
6. Stoughton, S.; Showak, M.; Mao, Q.; Koirala, P.; Hillsberry, D.; Sallis, S.; Kourkoutis, L.; Nguyen, K.; Piper, L.; Tenne, D.; Podraza, N.; Muller, D.; Adamo, C.; Schlom, D., Adsorption-controlled growth of BiVO<sub>4</sub> by molecular-beam epitaxy. *Apl Mater.* **2013**, 1, (4), 042112.
7. Cooper, J.; Gul, S.; Toma, F.; Chen, L.; Glans, P.; Guo, J.; Ager, J.; Yano, J.; Sharp, I., Electronic Structure of Monoclinic BiVO<sub>4</sub>. *Chem. Mater.* **2014**, 26, 5365-5373.
8. Cooper, J.; Gul, S.; Toma, F.; Chen, L.; Liu, Y.; Guo, J.; Ager, J.; Yano, J.; Sharp, I., Indirect Bandgap and Optical Properties of Monoclinic Bismuth Vanadate. *J. Phys. Chem. C* **2015**, 119, 2969-2974.
